# Supplementary material
Source: HighWire-hosted journal article supplement (https://ebmtp.com/highwire/filestream/135730/field_highwire_adjunct_files/0/hong_643.pdf)
Supplement: hong_643.pdf [file hong_643.pdf]

# 全脑MRI分型在发育不良相关额叶癫痫中的研究

Seok-Jun Hong, MSc; Boris C. Bernhardt, PhD; Dewi S. Schrader, MD;

Neda Bernasconi, MD, PhD; Andrea Bernasconi, MD

**目的：**对额叶癫痫患者实施全脑形态测量学检测，并评估组 - 水平模式对于个体诊断和预后的效用。

**方法：**我们通过 MRI 对经病理组织学验证的局灶性皮质发育不良（focal cortical dysplasia, FCD）的 2 个额叶癫痫队列（I 型 13 例、II 型 28 例）和 41 例高度匹配的对照组患者的皮质厚度及折叠复杂性进行了比较。通过模式学习算法评估组 - 水平的结果，以此预测个体 FCD 的组织学亚型、癫痫灶的位置以及术后癫痫转归。

**结果：**相对于对照组，I 型 FCD 表现为多叶脑皮质萎缩，在同侧额叶皮质中最显著。相反，II 型 FCD 表现为颞叶和中央后回皮质增厚。皮质折叠也存在差异，I 型 FCD 表现为前额叶皮层复杂性增加，而在 II 型中减少。组 - 水平结果可成功引导 FCD 亚型自动分类（I 型：100%、II 型：96%）、癫痫灶偏侧性判定（I 型：92%；II 型：86%）以及转归预测（I 型：92%；II 型：82%）。

**结论：**FCD 亚型与大脑结构表型多样性相关。II 型 FCD 皮质增厚可能表明修剪存在延迟，I 型 FCD 皮质萎缩可能由癫痫兴奋联合主要结构改变所致。组 - 水平模式在指导个体化诊断中具有较高的转化价值。 *Neurology*<sup>®</sup> 2016;86:643–650

（刘丽萍 审校）
